# Supplementary material
Source: Elsevier journal article supplement (https://ora.ox.ac.uk/objects/uuid:b1c9bee6-2ebe-48fa-bac3-948d4f6013ee/files/rw9505302j:mmc2.pdf)

# Fleur Chandler

**Discloser Identifier:** 143193765  
**Disclosure Purpose:** Valuing Child and Adolescent Health States for Use in Economic Evaluation: A Good Practices Report of an ISPOR Task Force - Valuing Child and Adolescent Health States for Use in Economic Evaluation: A Good Practices Report of an ISPOR Task Force

**Employment Information:** Currently Employed

## Summary of Interests

### Company or Organization

| Entity                        | Type         | Relevant to this Disclosure |
|-------------------------------|--------------|-----------------------------|
| Duchenne UK                   | Other        |                             |
| Category: Other               |              |                             |
| Fleur Chandler Consulting Ltd | Consultant   | Current Employment          |
| Category: Consultant          |              |                             |
| GlaxoSmithKline               | Stock        |                             |
| Sanofi                        | Stock        |                             |
| Sanofi                        | Stock Option |                             |

## Additional Questions

1. Please select which of the following apply to each relationship or activity:

a. Other Professional Activities - Other Duchenne UK

The relationship is outside the work reported in the manuscript but topically related and within the past 36 months

b. Other Professional Activities - Consultant Fleur Chandler Consulting Ltd

The relationship is outside the work reported in the manuscript but topically related and within the past 36 months

c. Stock GlaxoSmithKline

Neither

d. Stock Sanofi

Neither

e. Stock Option Sanofi

Neither
2. I confirm I have disclosed all direct support for the present manuscript (e.g. funding, provision of study materials, medical writing, article processing charges, etc.) There is no time limit for this item.

Yes
3. Please indicate below whether in the past 36 months you have had any of the following interests that are topically related to the work reported in the manuscript.

a. Employment (If you need to add an interest, please scroll to the top of the page, click "add interest" and select “Employment”)

Yes, as disclosed above

b. Grants or contracts for research (If you need to add an interest, please scroll to the top of the page, click "add interest" and select “Grant/Contract”)

No, I have no relevant interests of this type

- c. **Payment for consulting (If you need to add an interest, please scroll to the top of the page, click "add interest" and select "Independent Contractor")**

No, I have no relevant interests of this type

- d. **Payments or honoraria for lectures, presentations, speakers bureaus, or educational events (If you need to add an interest, please scroll to the top of the page, click "add interest" and select "Independent Contractor" and include the correct information under "Consultant")**

Yes, as disclosed above

- e. **Payment for service on an advisory board (If you need to add an interest, please scroll to the top of the page, click "add interest" and select "Independent Contractor," and choose "Other")**

No, I have no relevant interests of this type

- f. **Payment for participation Data and safety monitoring board (If you need to add an interest, please scroll to the top of the page, click "add interest" and select "Independent Contractor")**

No, I have no relevant interests of this type

- g. **Expert witness testimony (If you need to add an interest, please scroll to the top of the page, click "add interest" and select "Independent Contractor")**

No, I have no relevant interests of this type

- h. **Royalties from Patents, Trademarks, Copyrights or other intellectual property (If you need to add an interest, please scroll to the top of the page, click "add interest" and select the appropriate interest type)**

No, I have no relevant interests of this type

- i. **Patents planned, issued, or pending, whether or not you receive royalties (If you need to add an interest, please scroll to the top of the page, click "add interest" and select "Patents")**

No, I have no relevant interests of this type

- j. **Fiduciary Officer or Other Board Membership (If you need to add an interest, please scroll to the top of the page, click "add interest" and select "Fiduciary Officer")**

No, I have no relevant interests of this type

- k. **Stock or stock options (If you need to add an interest, please scroll to the top of the page, click "add interest" and select the appropriate interest type)**

Yes, as disclosed above

- l. **Support for attending meetings or other travel (If you need to add an interest, please scroll to the top of the page, click "add interest" and select "Travel")**

No, I have no relevant interests of this type

4. **Was any individual paid to provide professional writing assistance with this manuscript?**

No.

5. **Have you or your institution received equipment, materials, drugs, or services in direct support of the work in the manuscript (without time limit) not disclosed above?**

No.

6. **In the past 36 months, have you received equipment, materials, drugs, medical writing, gifts or other services from for-profit or not-for-profit third parties whose interests may be affected by the content of the manuscript not disclosed above?**

No.

7. **Are there other financial or non-financial interests that readers could perceive to have influenced, or that give the appearance of potentially influencing, what you wrote in the submitted work not disclosed above.**

No.

## Certification

I certify that I have answered every question and the information provided in this disclosure is complete and accurate.

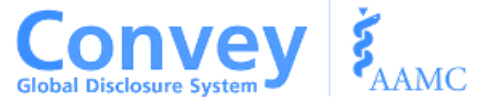

**Discloser Identifier:** 64180580  
**Disclosure Purpose:** Valuing Child and Adolescent Health States for Use in Economic Evaluation: A Good Practices Report of an ISPOR Task Force - Valuing Child and Adolescent Health States for Use in Economic Evaluation: A Good Practices Report of an ISPOR Task Force

**Employment Information:** Currently Employed

Summary of Interests

Company or Organization

| Entity                      | Type             | Relevant to this Disclosure       |
|-----------------------------|------------------|-----------------------------------|
| EuroQol Research Foundation | Grant / Contract | Yes                               |
| University of Melbourne     | Employment       | <div>Current Employment</div> Yes |
| Title:                      |                  |                                   |

Additional Questions

1. Please select which of the following apply to each relationship or activity:

a. Employment University of Melbourne

The relationship is in direct support of the work reported in the manuscript anytime from when the work was conceived

b. Grant / Contract EuroQol Research Foundation

The relationship is in direct support of the work reported in the manuscript anytime from when the work was conceived
2. I confirm I have disclosed all direct support for the present manuscript (e.g. funding, provision of study materials, medical writing, article processing charges, etc.) There is no time limit for this item.

Yes
3. Please indicate below whether in the past 36 months you have had any of the following interests that are topically related to the work reported in the manuscript.

a. Employment (If you need to add an interest, please scroll to the top of the page, click "add interest" and select "Employment")

Yes, as disclosed above

b. Grants or contracts for research (If you need to add an interest, please scroll to the top of the page, click "add interest" and select "Grant/Contract")

Yes, as disclosed above

c. Payment for consulting (If you need to add an interest, please scroll to the top of the page, click "add interest" and select "Independent Contractor")

No, I have no relevant interests of this type

d. Payments or honoraria for lectures, presentations, speakers bureaus, or educational events (If you need to add an interest, please scroll to the top of the page, click "add interest" and select "Independent Contractor" and include the correct information under "Consultant")

No, I have no relevant interests of this type

e. Payment for service on an advisory board (If you need to add an interest, please scroll to the top of the page, click "add interest" and select "Independent Contractor," and choose "Other")

No, I have no relevant interests of this type

f. Payment for participation Data and safety monitoring board (If you need to add an interest, please scroll to the top of the page, click "add interest" and select "Independent Contractor")

No, I have no relevant interests of this type

- g. Expert witness testimony (If you need to add an interest, please scroll to the top of the page, click "add interest" and select "Independent Contractor")**

No, I have no relevant interests of this type

- h. Royalties from Patents, Trademarks, Copyrights or other intellectual property (If you need to add an interest, please scroll to the top of the page, click "add interest" and select the appropriate interest type)**

No, I have no relevant interests of this type

- i. Patents planned, issued, or pending, whether or not you receive royalties (If you need to add an interest, please scroll to the top of the page, click "add interest" and select "Patents")**

No, I have no relevant interests of this type

- j. Fiduciary Officer or Other Board Membership (If you need to add an interest, please scroll to the top of the page, click "add interest" and select "Fiduciary Officer")**

No, I have no relevant interests of this type

- k. Stock or stock options (If you need to add an interest, please scroll to the top of the page, click "add interest" and select the appropriate interest type)**

No, I have no relevant interests of this type

- l. Support for attending meetings or other travel (If you need to add an interest, please scroll to the top of the page, click "add interest" and select "Travel")**

No, I have no relevant interests of this type

**4. Was any individual paid to provide professional writing assistance with this manuscript?**

No.

**5. Have you or your institution received equipment, materials, drugs, or services in direct support of the work in the manuscript (without time limit) not disclosed above?**

No.

**6. In the past 36 months, have you received equipment, materials, drugs, medical writing, gifts or other services from for-profit or not-for-profit third parties whose interests may be affected by the content of the manuscript not disclosed above?**

No.

**7. Are there other financial or non-financial interests that readers could perceive to have influenced, or that give the appearance of potentially influencing, what you wrote in the submitted work not disclosed above.**

No.

## Certification

I certify that I have answered every question and the information provided in this disclosure is complete and accurate.

**Discloser Identifier:** 55021894  
**Disclosure Purpose:** Valuing Child and Adolescent Health States for Use in Economic Evaluation: A Good Practices Report of an ISPOR Task Force - Valuing Child and Adolescent Health States for Use in Economic Evaluation: A Good Practices Report of an ISPOR Task Force

**Employment Information:** Currently Employed

Summary of Interests

Company or Organization

| Entity                               | Type       | Relevant to this Disclosure |
|--------------------------------------|------------|-----------------------------|
| EuroQol Research Foundation          | Other      | Yes                         |
| Category: Other                      |            |                             |
| University of Melbourne              | Employment | Current Employment<br>Yes   |
| Title: Professor of Health Economics |            |                             |

Additional Questions

1. Please select which of the following apply to each relationship or activity:

a. Other Professional Activities - Other EuroQol Research Foundation

The relationship is outside the work reported in the manuscript but topically related and within the past 36 months

b. Employment University of Melbourne

Neither
2. I confirm I have disclosed all direct support for the present manuscript (e.g. funding, provision of study materials, medical writing, article processing charges, etc.) There is no time limit for this item.

Yes
3. Please indicate below whether in the past 36 months you have had any of the following interests that are topically related to the work reported in the manuscript.

a. Employment (If you need to add an interest, please scroll to the top of the page, click "add interest" and select “Employment”)

Yes, as disclosed above

b. Grants or contracts for research (If you need to add an interest, please scroll to the top of the page, click "add interest" and select “Grant/Contract”)

Yes, as disclosed above

c. Payment for consulting (If you need to add an interest, please scroll to the top of the page, click "add interest" and select “Independent Contractor”)

No, I have no relevant interests of this type

d. Payments or honoraria for lectures, presentations, speakers bureaus, or educational events (If you need to add an interest, please scroll to the top of the page, click "add interest" and select "Independent Contractor" and include the correct information under "Consultant")

Yes, as disclosed above

e. Payment for service on an advisory board (If you need to add an interest, please scroll to the top of the page, click "add interest" and select “Independent Contractor,” and choose “Other”)

No, I have no relevant interests of this type

**f. Payment for participation Data and safety monitoring board (If you need to add an interest, please scroll to the top of the page, click "add interest" and select "Independent Contractor")**

No, I have no relevant interests of this type

**g. Expert witness testimony (If you need to add an interest, please scroll to the top of the page, click "add interest" and select "Independent Contractor")**

No, I have no relevant interests of this type

**h. Royalties from Patents, Trademarks, Copyrights or other intellectual property (If you need to add an interest, please scroll to the top of the page, click "add interest" and select the appropriate interest type)**

No, I have no relevant interests of this type

**i. Patents planned, issued, or pending, whether or not you receive royalties (If you need to add an interest, please scroll to the top of the page, click "add interest" and select "Patents")**

No, I have no relevant interests of this type

**j. Fiduciary Officer or Other Board Membership (If you need to add an interest, please scroll to the top of the page, click "add interest" and select "Fiduciary Officer")**

Yes, as disclosed above

**k. Stock or stock options (If you need to add an interest, please scroll to the top of the page, click "add interest" and select the appropriate interest type)**

No, I have no relevant interests of this type

**l. Support for attending meetings or other travel (If you need to add an interest, please scroll to the top of the page, click "add interest" and select "Travel")**

Yes, as disclosed above

**4. Was any individual paid to provide professional writing assistance with this manuscript?**

No.

**5. Have you or your institution received equipment, materials, drugs, or services in direct support of the work in the manuscript (without time limit) not disclosed above?**

No.

**6. In the past 36 months, have you received equipment, materials, drugs, medical writing, gifts or other services from for-profit or not-for-profit third parties whose interests may be affected by the content of the manuscript not disclosed above?**

No.

**7. Are there other financial or non-financial interests that readers could perceive to have influenced, or that give the appearance of potentially influencing, what you wrote in the submitted work not disclosed above.**

No.

## Certification

I certify that I have answered every question and the information provided in this disclosure is complete and accurate.

**Discloser Identifier:** 74140598  
**Disclosure Purpose:** Valuing Child and Adolescent Health States for Use in Economic Evaluation: A Good Practices Report of an ISPOR Task Force - Valuing Child and Adolescent Health States for Use in Economic Evaluation: A Good Practices Report of an ISPOR Task Force

**Employment Information:** Currently Employed

Summary of Interests

Company or Organization

| Entity                                                                  | Type       | Relevant to this Disclosure |
|-------------------------------------------------------------------------|------------|-----------------------------|
| Pfizer                                                                  | Employment | Current Employment<br>Yes   |
| Title: Senior Director, HTA, Value & Evidence Strategy (HV&E) Team Lead |            |                             |

Additional Questions

1. Please select which of the following apply to each relationship or activity:

a. Employment Pfizer

The relationship is outside the work reported in the manuscript but topically related and within the past 36 months
2. I confirm I have disclosed all direct support for the present manuscript (e.g. funding, provision of study materials, medical writing, article processing charges, etc.) There is no time limit for this item.

Yes
3. Please indicate below whether in the past 36 months you have had any of the following interests that are topically related to the work reported in the manuscript.

a. Employment (If you need to add an interest, please scroll to the top of the page, click "add interest" and select “Employment”)

Yes, as disclosed above

b. Grants or contracts for research (If you need to add an interest, please scroll to the top of the page, click "add interest" and select “Grant/Contract”)

No, I have no relevant interests of this type

c. Payment for consulting (If you need to add an interest, please scroll to the top of the page, click "add interest" and select “Independent Contractor”)

No, I have no relevant interests of this type

d. Payments or honoraria for lectures, presentations, speakers bureaus, or educational events (If you need to add an interest, please scroll to the top of the page, click "add interest" and select "Independent Contractor" and include the correct information under "Consultant")

No, I have no relevant interests of this type

e. Payment for service on an advisory board (If you need to add an interest, please scroll to the top of the page, click "add interest" and select “Independent Contractor,” and choose “Other”)

No, I have no relevant interests of this type

f. Payment for participation Data and safety monitoring board (If you need to add an interest, please scroll to the top of the page, click "add interest" and select “Independent Contractor”)

No, I have no relevant interests of this type

g. Expert witness testimony (If you need to add an interest, please scroll to the top of the page, click "add interest" and select “Independent Contractor”)

No, I have no relevant interests of this type



**h. Royalties from Patents, Trademarks, Copyrights or other intellectual property (If you need to add an interest, please scroll to the top of the page, click "add interest" and select the appropriate interest type)**

No, I have no relevant interests of this type

**i. Patents planned, issued, or pending, whether or not you receive royalties (If you need to add an interest, please scroll to the top of the page, click "add interest" and select "Patents")**

No, I have no relevant interests of this type

**j. Fiduciary Officer or Other Board Membership (If you need to add an interest, please scroll to the top of the page, click "add interest" and select "Fiduciary Officer")**

No, I have no relevant interests of this type

**k. Stock or stock options (If you need to add an interest, please scroll to the top of the page, click "add interest" and select the appropriate interest type)**

Yes, as disclosed above

**l. Support for attending meetings or other travel (If you need to add an interest, please scroll to the top of the page, click "add interest" and select "Travel")**

No, I have no relevant interests of this type

**4. Was any individual paid to provide professional writing assistance with this manuscript?**

No.

**5. Have you or your institution received equipment, materials, drugs, or services in direct support of the work in the manuscript (without time limit) not disclosed above?**

No.

**6. In the past 36 months, have you received equipment, materials, drugs, medical writing, gifts or other services from for-profit or not-for-profit third parties whose interests may be affected by the content of the manuscript not disclosed above?**

No.

**7. Are there other financial or non-financial interests that readers could perceive to have influenced, or that give the appearance of potentially influencing, what you wrote in the submitted work not disclosed above.**

No.

## Certification

I certify that I have answered every question and the information provided in this disclosure is complete and accurate.

**Discloser Identifier:** 55028820  
**Disclosure** Valuing Child and Adolescent Health States for Use in Economic Evaluation: A Good Practices Report of an ISPOR Task Force - Valuing  
**Purpose:** Child and Adolescent Health States for Use in Economic Evaluation: A Good Practices Report of an ISPOR Task Force

**Employment Information:** Currently Employed

Summary of Interests

Company or Organization

| Entity                        | Type       | Relevant to this Disclosure |
|-------------------------------|------------|-----------------------------|
| Thermo Fisher Scientific      | Employment | Current Employment          |
| Title: Senior Research Leader |            |                             |

Additional Questions

1. Please select which of the following apply to each relationship or activity:

a. Employment Thermo Fisher Scientific

The relationship is outside the work reported in the manuscript but topically related and within the past 36 months
2. I confirm I have disclosed all direct support for the present manuscript (e.g. funding, provision of study materials, medical writing, article processing charges, etc.) There is no time limit for this item.

Yes
3. Please indicate below whether in the past 36 months you have had any of the following interests that are topically related to the work reported in the manuscript.

a. Employment (If you need to add an interest, please scroll to the top of the page, click "add interest" and select “Employment”)

Yes, as disclosed above

b. Grants or contracts for research (If you need to add an interest, please scroll to the top of the page, click "add interest" and select “Grant/Contract”)

No, I have no relevant interests of this type

c. Payment for consulting (If you need to add an interest, please scroll to the top of the page, click "add interest" and select “Independent Contractor”)

No, I have no relevant interests of this type

d. Payments or honoraria for lectures, presentations, speakers bureaus, or educational events (If you need to add an interest, please scroll to the top of the page, click "add interest" and select "Independent Contractor" and include the correct information under "Consultant")

No, I have no relevant interests of this type

e. Payment for service on an advisory board (If you need to add an interest, please scroll to the top of the page, click "add interest" and select “Independent Contractor,” and choose “Other”)

No, I have no relevant interests of this type

f. Payment for participation Data and safety monitoring board (If you need to add an interest, please scroll to the top of the page, click "add interest" and select “Independent Contractor”)

No, I have no relevant interests of this type

g. Expert witness testimony (If you need to add an interest, please scroll to the top of the page, click "add interest" and select “Independent Contractor”)

No, I have no relevant interests of this type

**h. Royalties from Patents, Trademarks, Copyrights or other intellectual property (If you need to add an interest, please scroll to the top of the page, click "add interest" and select the appropriate interest type)**

No, I have no relevant interests of this type

**i. Patents planned, issued, or pending, whether or not you receive royalties (If you need to add an interest, please scroll to the top of the page, click "add interest" and select "Patents")**

No, I have no relevant interests of this type

**j. Fiduciary Officer or Other Board Membership (If you need to add an interest, please scroll to the top of the page, click "add interest" and select "Fiduciary Officer")**

No, I have no relevant interests of this type

**k. Stock or stock options (If you need to add an interest, please scroll to the top of the page, click "add interest" and select the appropriate interest type)**

No, I have no relevant interests of this type

**l. Support for attending meetings or other travel (If you need to add an interest, please scroll to the top of the page, click "add interest" and select "Travel")**

No, I have no relevant interests of this type

**4. Was any individual paid to provide professional writing assistance with this manuscript?**

No.

**5. Have you or your institution received equipment, materials, drugs, or services in direct support of the work in the manuscript (without time limit) not disclosed above?**

No.

**6. In the past 36 months, have you received equipment, materials, drugs, medical writing, gifts or other services from for-profit or not-for-profit third parties whose interests may be affected by the content of the manuscript not disclosed above?**

No.

**7. Are there other financial or non-financial interests that readers could perceive to have influenced, or that give the appearance of potentially influencing, what you wrote in the submitted work not disclosed above.**

No.

## Certification

I certify that I have answered every question and the information provided in this disclosure is complete and accurate.

**Discloser Identifier:** 103381448  
**Disclosure Purpose:** Valuing Child and Adolescent Health States for Use in Economic Evaluation: A Good Practices Report of an ISPOR Task Force - Valuing Child and Adolescent Health States for Use in Economic Evaluation: A Good Practices Report of an ISPOR Task Force

**Employment Information:** Currently Employed

Summary of Interests

Company or Organization

| Entity                                 | Type       | Relevant to this Disclosure |
|----------------------------------------|------------|-----------------------------|
| Medical School, University of Michigan | Employment | Current Employment          |
| Title: Professor                       |            |                             |

Additional Questions

1. Please select which of the following apply to each relationship or activity:

a. Employment Medical School, University of Michigan

The relationship is in direct support of the work reported in the manuscript anytime from when the work was conceived
2. I confirm I have disclosed all direct support for the present manuscript (e.g. funding, provision of study materials, medical writing, article processing charges, etc.) There is no time limit for this item.

Yes
3. Please indicate below whether in the past 36 months you have had any of the following interests that are topically related to the work reported in the manuscript.

a. Employment (If you need to add an interest, please scroll to the top of the page, click "add interest" and select "Employment")

No, I have no relevant interests of this type

b. Grants or contracts for research (If you need to add an interest, please scroll to the top of the page, click "add interest" and select "Grant/Contract")

No, I have no relevant interests of this type

c. Payment for consulting (If you need to add an interest, please scroll to the top of the page, click "add interest" and select "Independent Contractor")

No, I have no relevant interests of this type

d. Payments or honoraria for lectures, presentations, speakers bureaus, or educational events (If you need to add an interest, please scroll to the top of the page, click "add interest" and select "Independent Contractor" and include the correct information under "Consultant")

No, I have no relevant interests of this type

e. Payment for service on an advisory board (If you need to add an interest, please scroll to the top of the page, click "add interest" and select "Independent Contractor," and choose "Other")

No, I have no relevant interests of this type

f. Payment for participation Data and safety monitoring board (If you need to add an interest, please scroll to the top of the page, click "add interest" and select "Independent Contractor")

No, I have no relevant interests of this type

g. Expert witness testimony (If you need to add an interest, please scroll to the top of the page, click "add interest" and select "Independent Contractor")

No, I have no relevant interests of this type

**h. Royalties from Patents, Trademarks, Copyrights or other intellectual property (If you need to add an interest, please scroll to the top of the page, click "add interest" and select the appropriate interest type)**

No, I have no relevant interests of this type

**i. Patents planned, issued, or pending, whether or not you receive royalties (If you need to add an interest, please scroll to the top of the page, click "add interest" and select "Patents")**

No, I have no relevant interests of this type

**j. Fiduciary Officer or Other Board Membership (If you need to add an interest, please scroll to the top of the page, click "add interest" and select "Fiduciary Officer")**

No, I have no relevant interests of this type

**k. Stock or stock options (If you need to add an interest, please scroll to the top of the page, click "add interest" and select the appropriate interest type)**

No, I have no relevant interests of this type

**l. Support for attending meetings or other travel (If you need to add an interest, please scroll to the top of the page, click "add interest" and select "Travel")**

No, I have no relevant interests of this type

**4. Was any individual paid to provide professional writing assistance with this manuscript?**

No.

**5. Have you or your institution received equipment, materials, drugs, or services in direct support of the work in the manuscript (without time limit) not disclosed above?**

No.

**6. In the past 36 months, have you received equipment, materials, drugs, medical writing, gifts or other services from for-profit or not-for-profit third parties whose interests may be affected by the content of the manuscript not disclosed above?**

No.

**7. Are there other financial or non-financial interests that readers could perceive to have influenced, or that give the appearance of potentially influencing, what you wrote in the submitted work not disclosed above.**

No.

## Certification

I certify that I have answered every question and the information provided in this disclosure is complete and accurate.

**Discloser Identifier:** 55031992  
**Disclosure Purpose:** Valuing Child and Adolescent Health States for Use in Economic Evaluation: A Good Practices Report of an ISPOR Task Force - Valuing Child and Adolescent Health States for Use in Economic Evaluation: A Good Practices Report of an ISPOR Task Force

**Employment Information:** Currently Employed

Summary of Interests

Company or Organization

| Entity                                 | Type             | Relevant to this Disclosure       |
|----------------------------------------|------------------|-----------------------------------|
| EuroQol Research Foundation            | Grant / Contract | Yes                               |
| National Institute for Health Research | Grant / Contract |                                   |
| University Of Oxford                   | Employment       | <div>Current Employment</div> Yes |
| Title: Senior Health Economist         |                  |                                   |

Additional Questions

1. Please select which of the following apply to each relationship or activity:

a. Employment University Of Oxford

Neither

b. Grant / Contract EuroQol Research Foundation

The relationship is in direct support of the work reported in the manuscript anytime from when the work was conceived

c. Grant / Contract National Institute for Health Research

Neither
2. I confirm I have disclosed all direct support for the present manuscript (e.g. funding, provision of study materials, medical writing, article processing charges, etc.) There is no time limit for this item.

Yes
3. Please indicate below whether in the past 36 months you have had any of the following interests that are topically related to the work reported in the manuscript.

a. Employment (If you need to add an interest, please scroll to the top of the page, click "add interest" and select "Employment")

No, I have no relevant interests of this type

b. Grants or contracts for research (If you need to add an interest, please scroll to the top of the page, click "add interest" and select "Grant/Contract")

No, I have no relevant interests of this type

c. Payment for consulting (If you need to add an interest, please scroll to the top of the page, click "add interest" and select "Independent Contractor")

No, I have no relevant interests of this type

d. Payments or honoraria for lectures, presentations, speakers bureaus, or educational events (If you need to add an interest, please scroll to the top of the page, click "add interest" and select "Independent Contractor" and include the correct information under "Consultant")

No, I have no relevant interests of this type

e. Payment for service on an advisory board (If you need to add an interest, please scroll to the top of the page, click "add interest" and select "Independent Contractor," and choose "Other")

No, I have no relevant interests of this type

- f. Payment for participation Data and safety monitoring board (If you need to add an interest, please scroll to the top of the page, click "add interest" and select "Independent Contractor")**

No, I have no relevant interests of this type

- g. Expert witness testimony (If you need to add an interest, please scroll to the top of the page, click "add interest" and select "Independent Contractor")**

No, I have no relevant interests of this type

- h. Royalties from Patents, Trademarks, Copyrights or other intellectual property (If you need to add an interest, please scroll to the top of the page, click "add interest" and select the appropriate interest type)**

No, I have no relevant interests of this type

- i. Patents planned, issued, or pending, whether or not you receive royalties (If you need to add an interest, please scroll to the top of the page, click "add interest" and select "Patents")**

No, I have no relevant interests of this type

- j. Fiduciary Officer or Other Board Membership (If you need to add an interest, please scroll to the top of the page, click "add interest" and select "Fiduciary Officer")**

No, I have no relevant interests of this type

- k. Stock or stock options (If you need to add an interest, please scroll to the top of the page, click "add interest" and select the appropriate interest type)**

No, I have no relevant interests of this type

- l. Support for attending meetings or other travel (If you need to add an interest, please scroll to the top of the page, click "add interest" and select "Travel")**

No, I have no relevant interests of this type

- 4. Was any individual paid to provide professional writing assistance with this manuscript?**

No.

- 5. Have you or your institution received equipment, materials, drugs, or services in direct support of the work in the manuscript (without time limit) not disclosed above?**

No.

- 6. In the past 36 months, have you received equipment, materials, drugs, medical writing, gifts or other services from for-profit or not-for-profit third parties whose interests may be affected by the content of the manuscript not disclosed above?**

No.

- 7. Are there other financial or non-financial interests that readers could perceive to have influenced, or that give the appearance of potentially influencing, what you wrote in the submitted work not disclosed above.**

No.

## Certification

I certify that I have answered every question and the information provided in this disclosure is complete and accurate.

**Discloser Identifier:** 55032238

**Disclosure Purpose:** Valuing Child and Adolescent Health States for Use in Economic Evaluation: A Good Practices Report of an ISPOR Task Force - Valuing Child and Adolescent Health States for Use in Economic Evaluation: A Good Practices Report of an ISPOR Task Force

**Employment Information:** Currently Employed

## Summary of Interests

### Company or Organization

| Entity                                              | Type             | Relevant to this Disclosure |
|-----------------------------------------------------|------------------|-----------------------------|
| EuroQol Research Foundation                         | Other            |                             |
| Category: Other                                     |                  |                             |
| EuroQol Research Foundation                         | Travel           | Yes                         |
| Horizon 2020 Framework Programme                    | Grant / Contract |                             |
| Innovative Medicines Initiative 2 Joint Undertaking | Grant / Contract |                             |
| Innovative Medicines Initiative 2 Joint Undertaking | Grant / Contract |                             |
| University of Sheffield                             | Employment       | Current Employment          |
| Title: Professor of Helath Economics                |                  |                             |

### Intellectual Property

| Type                                                                                                             | Is Licensed | Relevant to this Disclosure |
|------------------------------------------------------------------------------------------------------------------|-------------|-----------------------------|
| Other Intellectual Property - Receive developer royalties for SF-6Dv2, via my e                                  | -           |                             |
| Description: Receive developer royalties for SF-6Dv2, via my employer University of Sheffield, who own copyright |             |                             |
| Type: Royalties                                                                                                  |             |                             |

## Additional Questions

1. Please select which of the following apply to each relationship or activity:
- a. Other Professional Activities - Other EuroQol Research Foundation

The relationship is outside the work reported in the manuscript but topically related and within the past 36 months
- b. Employment University of Sheffield

The relationship is in direct support of the work reported in the manuscript anytime from when the work was conceived
- c. Grant / Contract Horizon 2020 Framework Programme

Neither
- d. Grant / Contract Innovative Medicines Initiative 2 Joint Undertaking

Neither
- e. Grant / Contract Innovative Medicines Initiative 2 Joint Undertaking

Neither
- f. Travel EuroQol Research Foundation

The relationship is outside the work reported in the manuscript but topically related and within the past 36 months



g. **Other Intellectual Property** Receive developer royalties for SF-6Dv2, via my employer University of Sheffield, who own copyright

Neither

2. **I confirm I have disclosed all direct support for the present manuscript (e.g. funding, provision of study materials, medical writing, article processing charges, etc.) There is no time limit for this item.**

Yes

3. **Please indicate below whether in the past 36 months you have had any of the following interests that are topically related to the work reported in the manuscript.**

a. **Employment (If you need to add an interest, please scroll to the top of the page, click "add interest" and select "Employment")**

Yes, as disclosed above

b. **Grants or contracts for research (If you need to add an interest, please scroll to the top of the page, click "add interest" and select "Grant/Contract")**

Yes, as disclosed above

c. **Payment for consulting (If you need to add an interest, please scroll to the top of the page, click "add interest" and select "Independent Contractor")**

No, I have no relevant interests of this type

d. **Payments or honoraria for lectures, presentations, speakers bureaus, or educational events (If you need to add an interest, please scroll to the top of the page, click "add interest" and select "Independent Contractor" and include the correct information under "Consultant")**

No, I have no relevant interests of this type

e. **Payment for service on an advisory board (If you need to add an interest, please scroll to the top of the page, click "add interest" and select "Independent Contractor," and choose "Other")**

No, I have no relevant interests of this type

f. **Payment for participation Data and safety monitoring board (If you need to add an interest, please scroll to the top of the page, click "add interest" and select "Independent Contractor")**

No, I have no relevant interests of this type

g. **Expert witness testimony (If you need to add an interest, please scroll to the top of the page, click "add interest" and select "Independent Contractor")**

No, I have no relevant interests of this type

h. **Royalties from Patents, Trademarks, Copyrights or other intellectual property (If you need to add an interest, please scroll to the top of the page, click "add interest" and select the appropriate interest type)**

No, I have no relevant interests of this type

i. **Patents planned, issued, or pending, whether or not you receive royalties (If you need to add an interest, please scroll to the top of the page, click "add interest" and select "Patents")**

No, I have no relevant interests of this type

j. **Fiduciary Officer or Other Board Membership (If you need to add an interest, please scroll to the top of the page, click "add interest" and select "Fiduciary Officer")**

No, I have no relevant interests of this type

k. **Stock or stock options (If you need to add an interest, please scroll to the top of the page, click "add interest" and select the appropriate interest type)**

No, I have no relevant interests of this type

l. **Support for attending meetings or other travel (If you need to add an interest, please scroll to the top of the page, click "add interest" and select "Travel")**

Yes, as disclosed above

4. **Was any individual paid to provide professional writing assistance with this manuscript?**

No.

**5. Have you or your institution received equipment, materials, drugs, or services in direct support of the work in the manuscript (without time limit) not disclosed above?**

No.

**6. In the past 36 months, have you received equipment, materials, drugs, medical writing, gifts or other services from for-profit or not-for-profit third parties whose interests may be affected by the content of the manuscript not disclosed above?**

No.

**7. Are there other financial or non-financial interests that readers could perceive to have influenced, or that give the appearance of potentially influencing, what you wrote in the submitted work not disclosed above.**

No.

## Certification

I certify that I have answered every question and the information provided in this disclosure is complete and accurate.

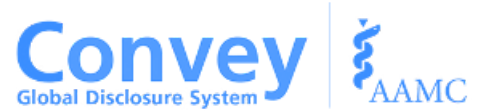

**Discloser Identifier:** 143193985  
**Disclosure Purpose:** Valuing Child and Adolescent Health States for Use in Economic Evaluation: A Good Practices Report of an ISPOR Task Force - Valuing Child and Adolescent Health States for Use in Economic Evaluation: A Good Practices Report of an ISPOR Task Force

**Employment Information:** Currently Employed

Summary of Interests

Company or Organization

| Entity                                                          | Type       | Relevant to this Disclosure |
|-----------------------------------------------------------------|------------|-----------------------------|
| Haute Autorité de Santé (French National Authority for Health ) | Employment | Current Employment          |
| Title: Scientific Referent in Health Economic Evaluation        |            |                             |

Additional Questions

1. Please select which of the following apply to each relationship or activity:

a. Employment Haute Autorité de Santé (French National Authority for Health )

Neither
2. I confirm I have disclosed all direct support for the present manuscript (e.g. funding, provision of study materials, medical writing, article processing charges, etc.) There is no time limit for this item.

Yes
3. Please indicate below whether in the past 36 months you have had any of the following interests that are topically related to the work reported in the manuscript.

a. Employment (If you need to add an interest, please scroll to the top of the page, click "add interest" and select “Employment”)

No, I have no relevant interests of this type

b. Grants or contracts for research (If you need to add an interest, please scroll to the top of the page, click "add interest" and select “Grant/Contract”)

No, I have no relevant interests of this type

c. Payment for consulting (If you need to add an interest, please scroll to the top of the page, click "add interest" and select “Independent Contractor”)

No, I have no relevant interests of this type

d. Payments or honoraria for lectures, presentations, speakers bureaus, or educational events (If you need to add an interest, please scroll to the top of the page, click "add interest" and select "Independent Contractor" and include the correct information under "Consultant")

No, I have no relevant interests of this type

e. Payment for service on an advisory board (If you need to add an interest, please scroll to the top of the page, click "add interest" and select “Independent Contractor,” and choose “Other”)

No, I have no relevant interests of this type

f. Payment for participation Data and safety monitoring board (If you need to add an interest, please scroll to the top of the page, click "add interest" and select “Independent Contractor”)

No, I have no relevant interests of this type

g. Expert witness testimony (If you need to add an interest, please scroll to the top of the page, click "add interest" and select “Independent Contractor”)

No, I have no relevant interests of this type

**h. Royalties from Patents, Trademarks, Copyrights or other intellectual property (If you need to add an interest, please scroll to the top of the page, click "add interest" and select the appropriate interest type)**

No, I have no relevant interests of this type

**i. Patents planned, issued, or pending, whether or not you receive royalties (If you need to add an interest, please scroll to the top of the page, click "add interest" and select "Patents")**

No, I have no relevant interests of this type

**j. Fiduciary Officer or Other Board Membership (If you need to add an interest, please scroll to the top of the page, click "add interest" and select "Fiduciary Officer")**

No, I have no relevant interests of this type

**k. Stock or stock options (If you need to add an interest, please scroll to the top of the page, click "add interest" and select the appropriate interest type)**

No, I have no relevant interests of this type

**l. Support for attending meetings or other travel (If you need to add an interest, please scroll to the top of the page, click "add interest" and select "Travel")**

No, I have no relevant interests of this type

**4. Was any individual paid to provide professional writing assistance with this manuscript?**

No.

**5. Have you or your institution received equipment, materials, drugs, or services in direct support of the work in the manuscript (without time limit) not disclosed above?**

No.

**6. In the past 36 months, have you received equipment, materials, drugs, medical writing, gifts or other services from for-profit or not-for-profit third parties whose interests may be affected by the content of the manuscript not disclosed above?**

No.

**7. Are there other financial or non-financial interests that readers could perceive to have influenced, or that give the appearance of potentially influencing, what you wrote in the submitted work not disclosed above.**

No.

## Certification

I certify that I have answered every question and the information provided in this disclosure is complete and accurate.

**Discloser Identifier:** 101665809  
**Disclosure Purpose:** Valuing Child and Adolescent Health States for Use in Economic Evaluation: A Good Practices Report of an ISPOR Task Force - Valuing Child and Adolescent Health States for Use in Economic Evaluation: A Good Practices Report of an ISPOR Task Force

**Employment Information:** Currently Employed

Summary of Interests

Company or Organization

| Entity                                            | Type       | Relevant to this Disclosure       |
|---------------------------------------------------|------------|-----------------------------------|
| EuroQol Research Foundation                       | Other      | Yes                               |
| Category: Other                                   |            |                                   |
| National Institute for Health and Care Excellence | Employment | <div>Current Employment</div> Yes |
| Title: Associate director                         |            |                                   |

Additional Questions

1. Please select which of the following apply to each relationship or activity:

a. Other Professional Activities - Other EuroQol Research Foundation

The relationship is outside the work reported in the manuscript but topically related and within the past 36 months

b. Employment National Institute for Health and Care Excellence

The relationship is in direct support of the work reported in the manuscript anytime from when the work was conceived
2. I confirm I have disclosed all direct support for the present manuscript (e.g. funding, provision of study materials, medical writing, article processing charges, etc.) There is no time limit for this item.
- Yes
3. Please indicate below whether in the past 36 months you have had any of the following interests that are topically related to the work reported in the manuscript.

a. Employment (If you need to add an interest, please scroll to the top of the page, click "add interest" and select “Employment”)

Yes, as disclosed above

b. Grants or contracts for research (If you need to add an interest, please scroll to the top of the page, click "add interest" and select “Grant/Contract”)

Yes, as disclosed above

c. Payment for consulting (If you need to add an interest, please scroll to the top of the page, click "add interest" and select “Independent Contractor”)

No, I have no relevant interests of this type

d. Payments or honoraria for lectures, presentations, speakers bureaus, or educational events (If you need to add an interest, please scroll to the top of the page, click "add interest" and select "Independent Contractor" and include the correct information under "Consultant")

No, I have no relevant interests of this type

e. Payment for service on an advisory board (If you need to add an interest, please scroll to the top of the page, click "add interest" and select “Independent Contractor,” and choose “Other”)

No, I have no relevant interests of this type

**f. Payment for participation Data and safety monitoring board (If you need to add an interest, please scroll to the top of the page, click "add interest" and select "Independent Contractor")**

No, I have no relevant interests of this type

**g. Expert witness testimony (If you need to add an interest, please scroll to the top of the page, click "add interest" and select "Independent Contractor")**

No, I have no relevant interests of this type

**h. Royalties from Patents, Trademarks, Copyrights or other intellectual property (If you need to add an interest, please scroll to the top of the page, click "add interest" and select the appropriate interest type)**

No, I have no relevant interests of this type

**i. Patents planned, issued, or pending, whether or not you receive royalties (If you need to add an interest, please scroll to the top of the page, click "add interest" and select "Patents")**

No, I have no relevant interests of this type

**j. Fiduciary Officer or Other Board Membership (If you need to add an interest, please scroll to the top of the page, click "add interest" and select "Fiduciary Officer")**

No, I have no relevant interests of this type

**k. Stock or stock options (If you need to add an interest, please scroll to the top of the page, click "add interest" and select the appropriate interest type)**

No, I have no relevant interests of this type

**l. Support for attending meetings or other travel (If you need to add an interest, please scroll to the top of the page, click "add interest" and select "Travel")**

Yes, as disclosed above

**4. Was any individual paid to provide professional writing assistance with this manuscript?**

No.

**5. Have you or your institution received equipment, materials, drugs, or services in direct support of the work in the manuscript (without time limit) not disclosed above?**

No.

**6. In the past 36 months, have you received equipment, materials, drugs, medical writing, gifts or other services from for-profit or not-for-profit third parties whose interests may be affected by the content of the manuscript not disclosed above?**

No.

**7. Are there other financial or non-financial interests that readers could perceive to have influenced, or that give the appearance of potentially influencing, what you wrote in the submitted work not disclosed above.**

No.

## Certification

I certify that I have answered every question and the information provided in this disclosure is complete and accurate.

**Discloser Identifier:** 60810311  
**Disclosure** Valuing Child and Adolescent Health States for Use in Economic Evaluation: A Good Practices Report of an ISPOR Task Force - Valuing  
**Purpose:** Child and Adolescent Health States for Use in Economic Evaluation: A Good Practices Report of an ISPOR Task Force

**Employment Information:** Currently Employed

Summary of Interests

Company or Organization

| Entity                      | Type                                     | Relevant to this Disclosure |
|-----------------------------|------------------------------------------|-----------------------------|
| EuroQol Research Foundation | Employment <div>Current Employment</div> | Yes                         |
| Title: Scientific director  |                                          |                             |
| EuroQol Research Foundation | Grant / Contract                         |                             |
| EuroQol Research Foundation | Other <div>Current Employment</div>      |                             |
| Category: Other             |                                          |                             |

Additional Questions

1. Please select which of the following apply to each relationship or activity:

a. Other Professional Activities - Other EuroQol Research Foundation

The relationship is outside the work reported in the manuscript but topically related and within the past 36 months

b. Employment EuroQol Research Foundation

The relationship is outside the work reported in the manuscript but topically related and within the past 36 months

c. Grant / Contract EuroQol Research Foundation

The relationship is outside the work reported in the manuscript but topically related and within the past 36 months
2. I confirm I have disclosed all direct support for the present manuscript (e.g. funding, provision of study materials, medical writing, article processing charges, etc.) There is no time limit for this item.

Yes
3. Please indicate below whether in the past 36 months you have had any of the following interests that are topically related to the work reported in the manuscript.

a. Employment (If you need to add an interest, please scroll to the top of the page, click "add interest" and select “Employment”)

Yes, as disclosed above

b. Grants or contracts for research (If you need to add an interest, please scroll to the top of the page, click "add interest" and select “Grant/Contract”)

Yes, as disclosed above

c. Payment for consulting (If you need to add an interest, please scroll to the top of the page, click "add interest" and select “Independent Contractor”)

No, I have no relevant interests of this type

d. Payments or honoraria for lectures, presentations, speakers bureaus, or educational events (If you need to add an interest, please scroll to the top of the page, click "add interest" and select "Independent Contractor" and include the correct information under "Consultant")

No, I have no relevant interests of this type

e. **Payment for service on an advisory board (If you need to add an interest, please scroll to the top of the page, click "add interest" and select "Independent Contractor," and choose "Other")**

No, I have no relevant interests of this type

f. **Payment for participation Data and safety monitoring board (If you need to add an interest, please scroll to the top of the page, click "add interest" and select "Independent Contractor")**

No, I have no relevant interests of this type

g. **Expert witness testimony (If you need to add an interest, please scroll to the top of the page, click "add interest" and select "Independent Contractor")**

No, I have no relevant interests of this type

h. **Royalties from Patents, Trademarks, Copyrights or other intellectual property (If you need to add an interest, please scroll to the top of the page, click "add interest" and select the appropriate interest type)**

No, I have no relevant interests of this type

i. **Patents planned, issued, or pending, whether or not you receive royalties (If you need to add an interest, please scroll to the top of the page, click "add interest" and select "Patents")**

No, I have no relevant interests of this type

j. **Fiduciary Officer or Other Board Membership (If you need to add an interest, please scroll to the top of the page, click "add interest" and select "Fiduciary Officer")**

No, I have no relevant interests of this type

k. **Stock or stock options (If you need to add an interest, please scroll to the top of the page, click "add interest" and select the appropriate interest type)**

No, I have no relevant interests of this type

l. **Support for attending meetings or other travel (If you need to add an interest, please scroll to the top of the page, click "add interest" and select "Travel")**

No, I have no relevant interests of this type

4. **Was any individual paid to provide professional writing assistance with this manuscript?**

No.

5. **Have you or your institution received equipment, materials, drugs, or services in direct support of the work in the manuscript (without time limit) not disclosed above?**

No.

6. **In the past 36 months, have you received equipment, materials, drugs, medical writing, gifts or other services from for-profit or not-for-profit third parties whose interests may be affected by the content of the manuscript not disclosed above?**

No.

7. **Are there other financial or non-financial interests that readers could perceive to have influenced, or that give the appearance of potentially influencing, what you wrote in the submitted work not disclosed above.**

No.

## Certification

I certify that I have answered every question and the information provided in this disclosure is complete and accurate.



**Discloser Identifier:** 143194389

**Disclosure** Valuing Child and Adolescent Health States for Use in Economic Evaluation: A Good Practices Report of an ISPOR Task Force - Valuing

**Purpose:** Child and Adolescent Health States for Use in Economic Evaluation: A Good Practices Report of an ISPOR Task Force

**Employment Information:** Currently Retired/Unemployed

## Summary of Interests

I do not have any interests to disclose at this time.

## Additional Questions

**1. Please select which of the following apply to each relationship or activity:**

You are not disclosing any interests to this organization.

**2. I confirm I have disclosed all direct support for the present manuscript (e.g. funding, provision of study materials, medical writing, article processing charges, etc.) There is no time limit for this item.**

Yes

**3. Please indicate below whether in the past 36 months you have had any of the following interests that are topically related to the work reported in the manuscript.**

**a. Employment (If you need to add an interest, please scroll to the top of the page, click "add interest" and select "Employment")**

No, I have no relevant interests of this type

**b. Grants or contracts for research (If you need to add an interest, please scroll to the top of the page, click "add interest" and select "Grant/Contract")**

No, I have no relevant interests of this type

**c. Payment for consulting (If you need to add an interest, please scroll to the top of the page, click "add interest" and select "Independent Contractor")**

No, I have no relevant interests of this type

**d. Payments or honoraria for lectures, presentations, speakers bureaus, or educational events (If you need to add an interest, please scroll to the top of the page, click "add interest" and select "Independent Contractor" and include the correct information under "Consultant")**

No, I have no relevant interests of this type

**e. Payment for service on an advisory board (If you need to add an interest, please scroll to the top of the page, click "add interest" and select "Independent Contractor," and choose "Other")**

No, I have no relevant interests of this type

**f. Payment for participation Data and safety monitoring board (If you need to add an interest, please scroll to the top of the page, click "add interest" and select "Independent Contractor")**

No, I have no relevant interests of this type

**g. Expert witness testimony (If you need to add an interest, please scroll to the top of the page, click "add interest" and select "Independent Contractor")**

No, I have no relevant interests of this type

**h. Royalties from Patents, Trademarks, Copyrights or other intellectual property (If you need to add an interest, please scroll to the top of the page, click "add interest" and select the appropriate interest type)**

No, I have no relevant interests of this type

**i. Patents planned, issued, or pending, whether or not you receive royalties (If you need to add an interest, please scroll to the top of the page, click "add interest" and select "Patents")**

No, I have no relevant interests of this type

- j. **Fiduciary Officer or Other Board Membership (If you need to add an interest, please scroll to the top of the page, click "add interest" and select "Fiduciary Officer")**

No, I have no relevant interests of this type

- k. **Stock or stock options (If you need to add an interest, please scroll to the top of the page, click "add interest" and select the appropriate interest type)**

No, I have no relevant interests of this type

- l. **Support for attending meetings or other travel (If you need to add an interest, please scroll to the top of the page, click "add interest" and select "Travel")**

No, I have no relevant interests of this type

4. **Was any individual paid to provide professional writing assistance with this manuscript?**

No.

5. **Have you or your institution received equipment, materials, drugs, or services in direct support of the work in the manuscript (without time limit) not disclosed above?**

No.

6. **In the past 36 months, have you received equipment, materials, drugs, medical writing, gifts or other services from for-profit or not-for-profit third parties whose interests may be affected by the content of the manuscript not disclosed above?**

No.

7. **Are there other financial or non-financial interests that readers could perceive to have influenced, or that give the appearance of potentially influencing, what you wrote in the submitted work not disclosed above.**

No.

## Certification

I certify that I have answered every question and the information provided in this disclosure is complete and accurate.

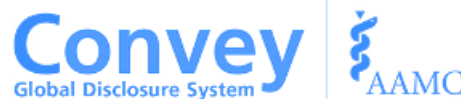

Supplement: mmc2 [file rw9505302j:mmc2.pdf]
